# Supplementary material for: The First Complete Mitochondrial Genome of Genus Isocapnia (Plecoptera: Capniidae) and Phylogenetic Assignment of Superfamily Nemouroidea
Source: MDPI journal article supplement (doi:10.3390/genes14050965), 2023-04-24
Supplement: s1 [file s1]

**Table S1.** Organization of the *I. anguis* mitochondrial genome

| Gene                 | Position (bp) | Size (bp)   | Direction | Intergenic Nucleotides (IGN) | Anti- or Start/ Stop Codons | A+T%  |
|----------------------|---------------|-------------|-----------|------------------------------|-----------------------------|-------|
| <i>trnIle</i> (I)    | F             | 1-66        | 66        | -                            | GAT                         | 62.12 |
| <i>trnGln</i> (Q)    | R             | 64-132      | 69        | -3                           | TTG                         | 69.57 |
| <i>trnMet</i> (M)    | F             | 133-201     | 69        | 0                            | CAT                         | 62.32 |
| <i>nad2</i>          | F             | 202-1236    | 1035      | 0                            | ATG/TAA                     | 68.02 |
| <i>trnTrp</i> (W)    | F             | 1235-1302   | 68        | -2                           | TCA                         | 70.59 |
| <i>trnCys</i> (C)    | R             | 1295-1362   | 68        | -8                           | GCA                         | 69.12 |
| <i>trnTyr</i> (Y)    | R             | 1365-1430   | 66        | 2                            | GTA                         | 62.12 |
| <i>cox1</i>          | F             | 1423-2967   | 1545      | -8                           | ATT/TAA                     | 60.26 |
| <i>trnLeu2</i> (UUR) | F             | 2963-3028   | 66        | -5                           | TAA                         | 65.15 |
| <i>cox2</i>          | F             | 3035-3722   | 688       | 6                            | ATG/T                       | 61.92 |
| <i>trnLys</i> (K)    | F             | 3723-3792   | 70        | 0                            | CTT                         | 62.86 |
| <i>trnAsp</i> (D)    | F             | 3793-3859   | 67        | 0                            | GTC                         | 79.10 |
| <i>atp8</i>          | F             | 3860-4018   | 159       | 0                            | ATT/TAA                     | 69.81 |
| <i>atp6</i>          | F             | 4012-4689   | 678       | -7                           | ATG/TAA                     | 64.16 |
| <i>cox3</i>          | F             | 4689-5477   | 789       | -1                           | ATG/TAA                     | 60.20 |
| <i>trnGly</i> (G)    | F             | 5479-5545   | 67        | 1                            | TCC                         | 73.13 |
| <i>nad3</i>          | F             | 5552-5899   | 348       | 6                            | ATA/TAG                     | 62.93 |
| <i>trnAla</i> (A)    | F             | 5898-5961   | 64        | -2                           | TGC                         | 67.19 |
| <i>trnArg</i> (R)    | F             | 5962-6025   | 64        | 0                            | TCG                         | 56.25 |
| <i>trnAsn</i> (N)    | F             | 6026-6092   | 67        | 0                            | GTT                         | 73.13 |
| <i>trnSer1</i> (AGN) | F             | 6093-6160   | 68        | 0                            | GCT                         | 64.71 |
| <i>trnGlu</i> (E)    | F             | 6161-6225   | 65        | 0                            | TTC                         | 86.15 |
| <i>trnPhe</i> (F)    | R             | 6224-6288   | 65        | -2                           | GAA                         | 67.69 |
| <i>nad5</i>          | R             | 6289-8020   | 1732      | 0                            | GTG/T                       | 67.67 |
| <i>trnHis</i> (H)    | R             | 8021-8088   | 68        | 0                            | GTG                         | 64.71 |
| <i>nad4</i>          | R             | 8089-9429   | 1341      | 0                            | ATG/TAG                     | 67.79 |
| <i>nad4l</i>         | R             | 9423-9719   | 297       | -7                           | ATG/TAA                     | 73.40 |
| <i>trnThr</i> (T)    | F             | 9722-9786   | 65        | 2                            | TGT                         | 81.54 |
| <i>trnPro</i> (P)    | R             | 9787-9852   | 66        | 0                            | TGG                         | 69.70 |
| <i>nad6</i>          | F             | 9854-10378  | 525       | 1                            | ATT/TAA                     | 66.29 |
| <i>Cytb</i>          | F             | 10378-11514 | 1137      | -1                           | ATG/TAG                     | 61.30 |
| <i>trnSer2</i> (UCN) | F             | 11513-11582 | 70        | -2                           | TGA                         | 74.29 |
| <i>nad1</i>          | R             | 11599-12543 | 945       | 16                           | ATA/TAG                     | 65.93 |
| <i>trnLeu1</i> (CUN) | R             | 12551-12616 | 66        | 7                            | TAG                         | 71.21 |
| <i>rrnL</i>          | R             | 12616-13948 | 1333      | -1                           | -                           | 72.47 |
| <i>trnVal</i> (V)    | R             | 13946-14016 | 71        | -3                           | TAC                         | 66.20 |
| <i>rrnS</i>          | R             | 14016-14807 | 792       | -1                           | -                           | 69.07 |
| CR                   |               | 14808-16200 |           | 0                            | -                           | 66.62 |

**Table S2.** A + T content of different components or positions among mitogenome of the family Capniidae

| Species Name                  | Full genome | PCGs  | First position | Second position | Third position |
|-------------------------------|-------------|-------|----------------|-----------------|----------------|
| <i>Apterooperla tikumana</i>  | 66.51       | 65.73 | 65.42          | 66.11           | 65.68          |
| <i>Mesocapnia arizonensis</i> | 68.49       | 67.54 | 67.85          | 65.23           | 69.54          |
| <i>Mesocapnia daxingana</i>   | 68.34       | 66.57 | 66.46          | 64.59           | 68.65          |
| <i>Zwicknia bifrons</i>       | 68.89       | 68.03 | 67.22          | 69.57           | 67.29          |
| <i>Capnia zijinshana</i>      | 68.47       | 68.27 | 65.41          | 66.17           | 73.24          |
| <i>Isocapnia anguis</i>       | 66.19       | 64.78 | 63.96          | 65.08           | 65.27          |

**Table S3.** A + T content of different PCGs among mitogenome of the family Capniidae

| Species Name                  | <i>atp6</i> | <i>atp8</i> | <i>cox1</i> | <i>cox2</i> | <i>cox3</i> | <i>cytb</i> | <i>nd1</i> | <i>nd2</i> | <i>nd3</i> | <i>nd4</i> | <i>nd4l</i> | <i>nd5</i> | <i>nd6</i> |
|-------------------------------|-------------|-------------|-------------|-------------|-------------|-------------|------------|------------|------------|------------|-------------|------------|------------|
| <i>Apterooperla tikumana</i>  | 63.42       | 67.92       | 62.14       | 65.26       | 60.71       | 62.08       | 65.46      | 68.02      | 68.22      | 68.01      | 72.03       | 68.21      | 72         |
| <i>Mesocapnia arizonensis</i> | 66.37       | 69.81       | 63.7        | 67.15       | 62.99       | 64.38       | 67.51      | 69.28      | 68.36      | 69.72      | 74.07       | 70.38      | 71.24      |
| <i>Mesocapnia daxingana</i>   | 67.11       | 68.55       | 61.69       | 66.28       | 61.6        | 62.53       | 67.51      | 68.7       | 69.21      | 68.83      | 73.74       | 69.4       | 69.33      |
| <i>Zwicknia bifrons</i>       | 68.88       | 69.81       | 64.94       | 65.99       | 63.62       | 65.00       | 68.98      | 69.57      | 69.39      | 69.95      | 75.82       | 69.4       | 72.19      |
| <i>Capnia zijinshana</i>      | 68.29       | 69.81       | 64.3        | 65.55       | 63.5        | 66.49       | 69.93      | 70.02      | 70.34      | 69.95      | 74.07       | 70.21      | 73.14      |
| <i>Isocapnia anguis</i>       | 64.16       | 69.81       | 60.26       | 61.92       | 60.2        | 61.3        | 65.93      | 68.02      | 62.93      | 67.79      | 73.4        | 67.67      | 66.29      |
| Average                       | 66.37       | 69.28       | 62.83       | 65.35       | 62.10       | 63.63       | 67.55      | 68.93      | 68.07      | 69.04      | 73.85       | 69.21      | 70.69      |

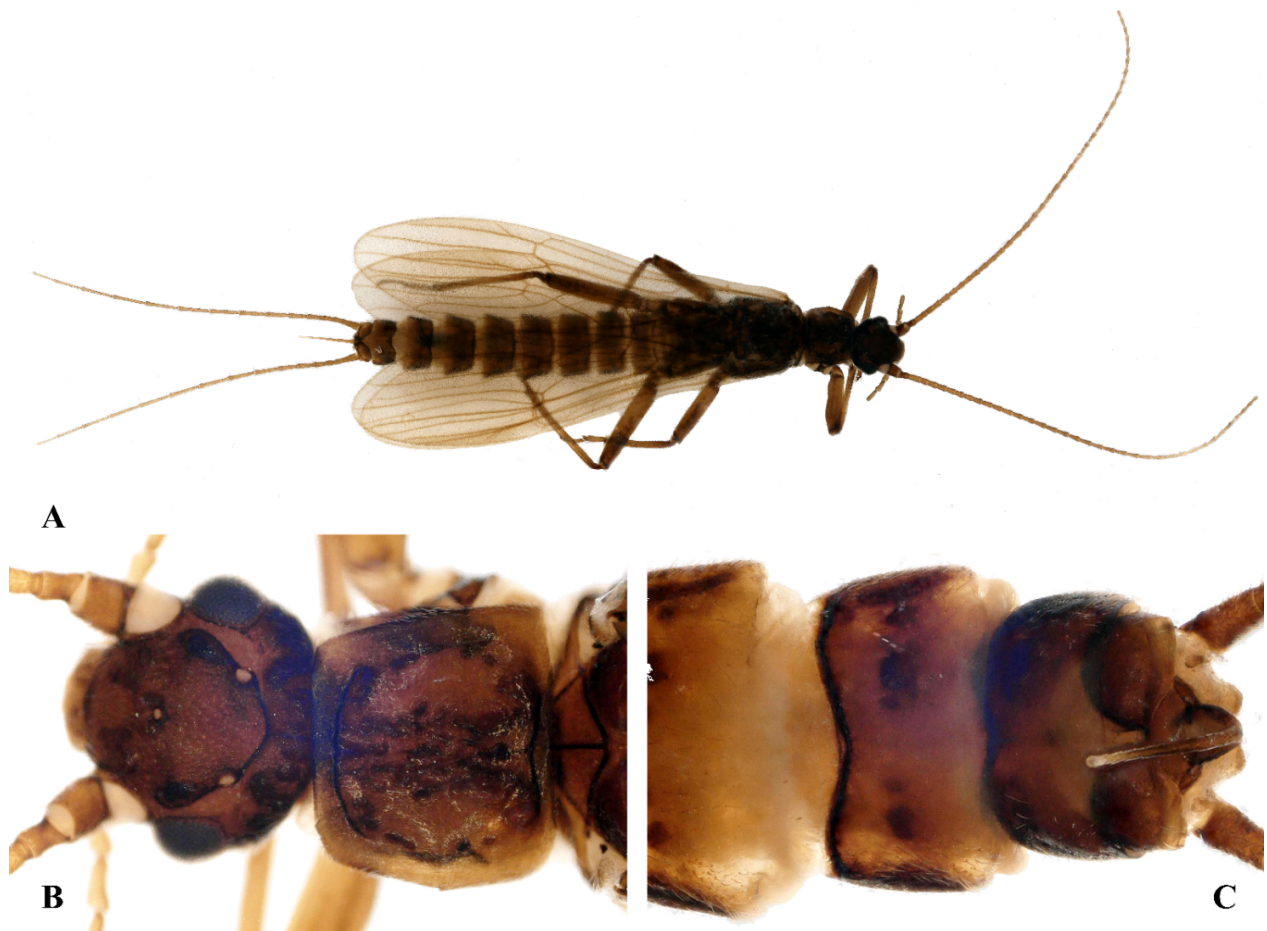

**Figure S1.** (A) *I. anguis* adult habitus dorsal view, (B) head and thorax dorsal view, (C) terminalia dorsal view.
